# Supplementary material for: Struo2: efficient metagenome profiling database construction for ever-expanding microbial genome datasets
Source: bioRxiv or medRxiv preprint supplement (doi:10.1101/2021.02.10.430604), 2021-02-10
Supplement: Supplementary file [file media-1.pdf]

1

## Supplemental Materials

2 **Struo2: efficient metagenome profiling database construction for ever-expanding**  
3 **microbial genome datasets**

4

Nicholas D. Youngblut<sup>\*,1</sup>, Ruth E. Ley<sup>1</sup>

5 <sup>1</sup>Department of Microbiome Science, Max Planck Institute for Developmental Biology, Max Planck Ring 5,

6

72076 Tübingen, Germany

## 7 Supplemental Methods

### 8 *Struo2 database creation algorithm*

9 Struo2 can generate database files for 4 main database types: “Kraken2”, “Bracken”,  
10 “genes”, and “HUMAN3” (Wood *et al.*, 2019; Lu *et al.*, 2017; Franzosa *et al.*, 2018). Struo2  
11 uses snakemake and conda (Köster and Rahmann, 2012), and so there are no dependencies  
12 that must be installed prior to pipeline execution besides snakemake, conda, and pandas (for  
13 input table loading). Moreover, snakemake allows for efficient job execution and easy scaling on  
14 to high performance computing systems. We note that the Struo2 pipeline code is a substantial  
15 re-write and expansion of the original Struo pipeline (e.g., ~1500 versus ~7000 lines of code in  
16 Struo versus Struo2, respectively).

17 The user input for Struo2 database creation is a table that lists: i) unique taxon names, ii)  
18 assembly accession identifiers (if available), iii) paths to (compressed) genome assembly fasta  
19 files, iv) taxonomy identifiers (taxids) used for Kraken2 database construction, and v)  
20 taxonomies at the genus and species levels (used for HUMAN3). We provide 2 utility scripts to  
21 aid in construction of custom databases from genomes in the GTDB: *GTDB\_metadata\_filter.R*  
22 and *genome\_download.R*. *GTDB\_metadata\_filter.R* can filter the publicly available GTDB  
23 archaeal and bacterial genome metadata files to a select subset of genomes (e.g., those with a  
24 lower CheckM-estimated contamination). *genome\_download.R* can then download all of the  
25 user-selected GTDB genomes and add the path to the genome assembly fasta files to the  
26 GTDB metadata table. This updated metadata table can then be directly used as input to GTDB.

27 For construction of the custom Kraken2 database, contigs are renamed to  
28 “kraken:taxid|<taxid>|<seqid>”, as described in the Kraken2 manual  
29 (<https://github.com/DerrickWood/kraken2/wiki/Manual>). The renamed contigs are added to a  
30 new Kraken2 database via *kraken-build*, and then the database is constructed via the same  
31 command. By default, the GTDB taxonomy is used, which entails providing custom GTDB  
32 taxdump files created via the *gtdb\_to\_taxdump.py* utility tool (available at  
33 [https://github.com/nick-youngblut/gtdb\\_to\\_taxdump](https://github.com/nick-youngblut/gtdb_to_taxdump)). The “taxonomy” and “library” directories  
34 created by Kraken2 for temporary file storage are saved in order to expedite database updating  
35 with new genomes.

36 Custom Bracken database files are created for any number of read lengths that the user  
37 specifies (100 and 150 base pairs by default). The *bracken-build.py* script is used within the  
38 pipeline for constructing each Bracken database.

39 In order to construct a custom HUMAN3 database, Struo2 first creates a precursor  
40 “genes” database, which consists of gene sequences from each genome and gene clusters  
41 generated via *mmseqs linclust*. To construct the “genes” database, genes are first called via  
42 prodigal (Hyatt *et al.*, 2010), and then de-replicated at 97% sequence identity with vsearch  
43 (Rognes *et al.*, 2016), which is similar to the standard HUMAN database construction process  
44 (Franzosa *et al.*, 2018). Non-redundant gene sequences from all genomes are combined, and  
45 the metadata of each gene sequence (e.g., genome of origin, contig of origin, and location on  
46 the contig) is also combined into one text file. The amino acid gene sequences are clustered via  
47 *mmseqs linclust*. By default, gene cluster representative sequences are annotated against  
48 UniRef90 (version 2019-01; the same as used by HUMAN3) via *mmseqs search* with 2 search  
49 iterations and 3 sensitivity steps (min=1, max=6). Prior to annotation, the sequence queries are  
50 split into *n* batches and run in parallel for faster distributed searching with snakemake (*n* is

51 user-defined). For each gene cluster, the UniRef90 annotations are propagated to each gene.  
52 UniRef90 annotations are mapped to UniRef50 identifiers via a mapping file created from the  
53 UniRef90.xml file available from the UniProt ftp server  
54 (<ftp://ftp.uniprot.org/pub/databases/uniprot/>). The *unirefxml2clust50-90idx.py* utility script is used  
55 to generate this mapping file (available at [https://github.com/nick-youngblut/gtdb\\_to\\_taxdump](https://github.com/nick-youngblut/gtdb_to_taxdump)).  
56 The mapping of UniRef90 to UniRef50 identifiers obviates the need to annotate genes  
57 separately against UniRef90 and UniRef50. We note that Struo requires separate rounds of  
58 annotation to each UniRef database instead of this UniRef90-to-UniRef50 mapping approach,  
59 which greatly increases the run time versus Struo2 when the goal is to obtain annotations for  
60 both UniRef90 and UniRef50. Note that the genes database includes both nucleotide and amino  
61 acid sequences for each gene.

62 The annotated gene sequences are renamed in the format  
63 “<UniRefID>|<gene\_length>|g\_\_<genus>;s\_\_<species>” for creation of the HUMAnN3  
64 database. Note that the taxonomy information is provided by the user in the original input table.  
65 *bowtie2-build* and *diamond makedb* are used to generate a HUMAnN3-compatible bowtie2 and  
66 DIAMOND databases of all annotated gene nucleotide and amino acid sequences, respectively.

### 67 *Struo2 database update algorithm*

68 Struo2 can update existing Struo2-generated Kraken2, Bracken, genes, and HUMAnN3  
69 databases. The databases can be updated with new genomes or individual gene sequences  
70 (e.g., created via metagenome assembly with PLASS (Steinegger *et al.*, 2019)).

71 If the input is a set of new genomes, the input is essentially the same as for database  
72 creation, except the existing database files must also be provided. Database updating with  
73 individual gene sequences requires the gene sequences in amino acid format (and also  
74 nucleotide, if available) and metadata on each gene (i.e., the genus- and species-level  
75 taxonomy inferred via *mmseqs taxonomy* or other approaches).

76 Kraken2 custom databases are updated via adding more genomes to the existing library  
77 via *kraken-build*. New Bracken databases are created from the updated Kraken2 database.

78 Gene sequences, either originating from new genomes or new individual sequences, are  
79 added to the existing mmseqs gene cluster database via *mmseqs clusterupdate*. Newly formed  
80 clusters are annotated with *mmseqs search*, while existing annotations are used for existing  
81 clusters. The updated database of annotated genes are used for creating new  
82 HUMAnN3-compatible bowtie2 and DIAMOND databases.

### 83 *Benchmarking*

84 We used genomes from the GTDB (Release 95) for all benchmarking.  
85 Only genomes with  $\geq 50\%$  CheckM-estimated completeness,  $< 5\%$  CheckM-estimated  
86 contamination were included (Parks *et al.*, 2015). To reduce biases towards species with large  
87 numbers of representative genomes, we selected one genome per species. The genome with  
88 the highest estimated completeness and lowest estimated contamination was selected for all  
89 candidates of each species. The final pool consisted of 30,989 genomes (Figure S2).

90 We used the same genome subsets for benchmarking database creation with both Struo  
91 and Struo2. We benchmarked the combined time to generate Kraken2, Bracken, and HUMAnN  
92 databases, which included both UniRef50 and UniRef90 annotations for the HUMAnN

93 databases. Both pipelines were run on the same computational architecture, consisting of a high  
94 performance computing cluster comprising nodes running Ubuntu 18.04.5 with AMD Epyc CPUs  
95 and 0.5-2 terabytes of RAM. The CPU hours shown in Figure 1B are the sum of all CPU hours  
96 for all snakemake jobs, as recorded via snakemake's benchmarking feature.

97 We only benchmarked database updating for Struo2, given that Struo cannot update  
98 databases, and we clearly show in Figure 1B that database generation is much slower for Struo.  
99 We first used Struo2 to generate custom Kraken2, Bracken, and HUMAnN databases from 1000  
100 genomes. These "n1000" databases were used for all database update benchmarking. The  
101 genomes used for database update benchmarking did not overlap with any genomes used to  
102 generate the n1000 databases, and they did not overlap with each other. We used subsets of  
103 10, 100, 175, 250, 350, and 500 genomes. We used the linear regression models shown in  
104 Figure 1B to estimate the CPU hours that would be required to generate each database from  
105 scratch rather than updating.

#### 106 *Struo2 databases from GTDB Release 95*

107 The genomes selected were as reported for the benchmarking of Struo and Struo2. The  
108 custom Kraken2, Bracken, genes, and HUMAnN3 databases are available at:  
109 <http://ftp.tue.mpg.de/ebio/projects/struo2/>. We will publish new versions of each database as  
110 new releases of the GTDB are published.

#### 111 *Utility tools*

112 We have generated a set of utility tools for aiding in the construction of input for Struo2  
113 and generally facilitating the integration of the GTDB taxonomy into existing bioinformatics  
114 pipelines. Some of these tools are described elsewhere in the Supplement Methods. We note 2  
115 utility tools that can have a broad applicability: *gtdb\_to\_taxdump.py* and *ncbi-gtdb\_map.py*. The  
116 former can convert the GTDB taxonomy, as documented in the GTDB bacterial and archaeal  
117 metadata table, to NCBI-formatted taxdump files. These taxdump files can be used with any  
118 existing software that requires taxdump files, such as taxonkit (Shen and Xiong, 2019) or  
119 KrakenUniq (Breitwieser *et al.*, 2018). *ncbi-gtdb\_map.py* maps between NCBI and GTDB  
120 taxonomies, based on the taxonomy information provided in the GTDB archaeal and bacterial  
121 metadata files. This tool can be useful for converting GTDB-Tk classifications to NCBI  
122 taxonomies (Chaumeil *et al.*, 2019), or converting existing NCBI taxonomies to GTDB  
123 taxonomies without requiring re-classification.

124 **Supplemental Figures**

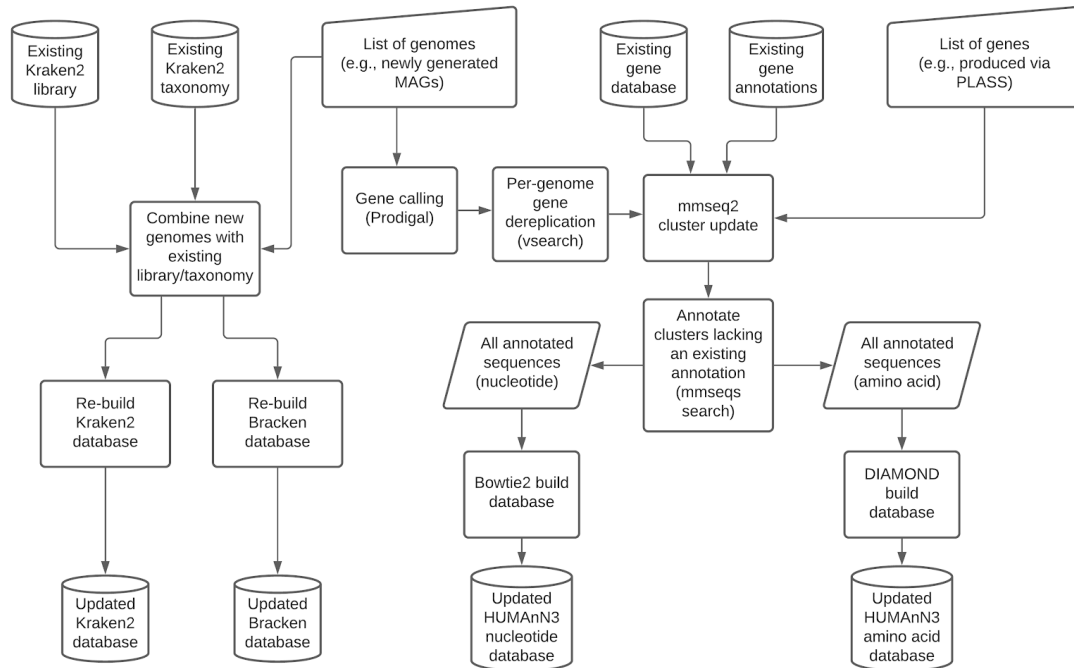

125 **Figure S1.** An overview of the Struo2 algorithm for database updating. Cylinders are input or  
 126 output files, squares are processes, and right-tilted rhomboids are intermediate files. Existing  
 127 Kraken2, Bracken, genes, and HUMAN3 databases can be updated with new genomes, while only  
 128 existing genes and HUMAN3 databases can be updated with new individual gene sequences.

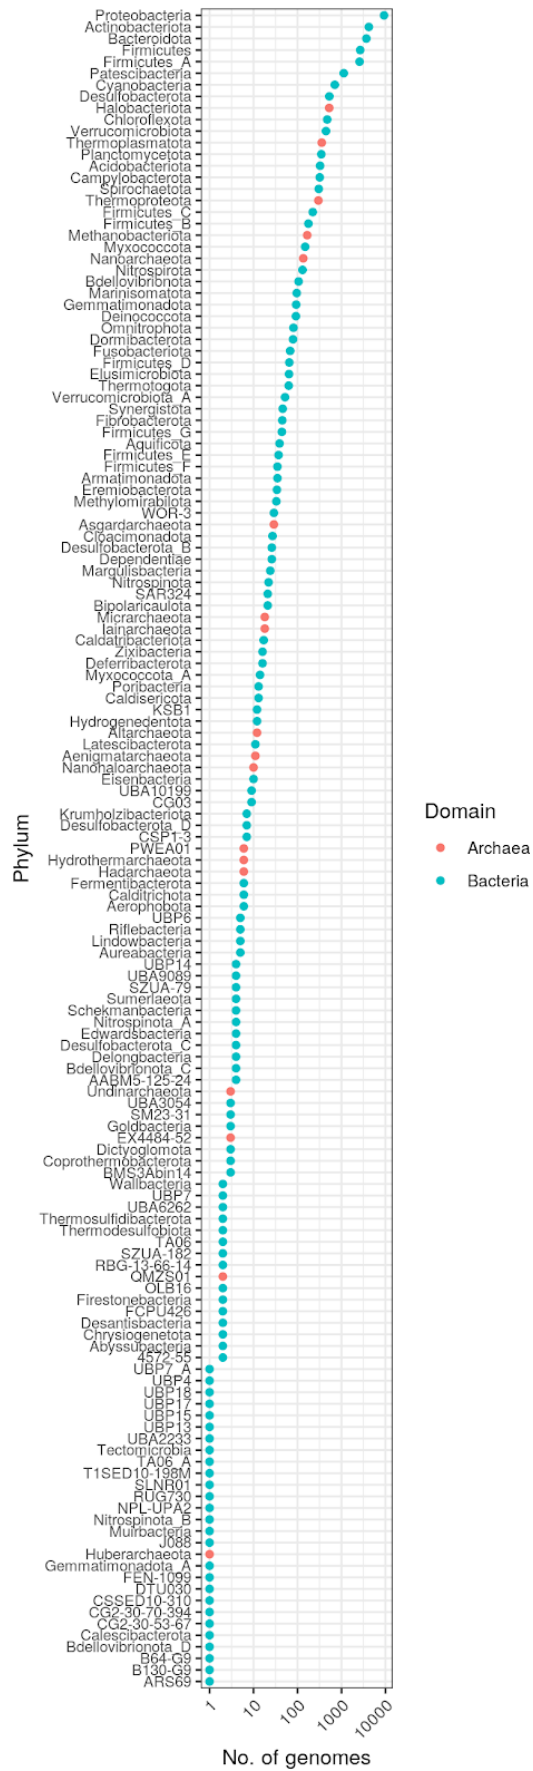

129 **Figure S2.** The number of GTDB genomes per phylum used for Struo2 generation of the custom  
130 Kraken2, Bracken, genes, and HUMAnN3 databases available at  
131 <http://ftp.tue.mpg.de/ebio/projects/struo2/>. See the Supplemental Methods for information on how  
132 genomes were selected. The phylum names shown are based on the GTDB taxonomy.

### 133 Supplemental References

- 134 Breitwieser,F.P. *et al.* (2018) KrakenUniq: confident and fast metagenomics classification using  
135 unique k-mer counts. *Genome Biol.*, **19**, 198.
- 136 Chaumeil,P.-A. *et al.* (2019) GTDB-Tk: a toolkit to classify genomes with the Genome Taxonomy  
137 Database. *Bioinformatics*.
- 138 Franzosa,E.A. *et al.* (2018) Species-level functional profiling of metagenomes and  
139 metatranscriptomes. *Nat. Methods*, **15**, 962–968.
- 140 Hyatt,D. *et al.* (2010) Prodigal: prokaryotic gene recognition and translation initiation site  
141 identification. *BMC Bioinformatics*, **11**, 119.
- 142 Köster,J. and Rahmann,S. (2012) Snakemake--a scalable bioinformatics workflow engine.  
143 *Bioinformatics*, **28**, 2520–2522.
- 144 Lu,J. *et al.* (2017) Bracken: estimating species abundance in metagenomics data. *PeerJ*  
145 *Comput. Sci.*, **3**, e104.
- 146 Parks,D.H. *et al.* (2015) CheckM: assessing the quality of microbial genomes recovered from  
147 isolates, single cells, and metagenomes. *Genome Res.*, **25**, 1043–1055.
- 148 Rognes,T. *et al.* (2016) VSEARCH: a versatile open source tool for metagenomics. *PeerJ*, **4**,  
149 e2584.
- 150 Shen,W. and Xiong,J. (2019) TaxonKit: a cross-platform and efficient NCBI taxonomy toolkit.  
151 *Cold Spring Harbor Laboratory*, 513523.
- 152 Steinegger,M. *et al.* (2019) Protein-level assembly increases protein sequence recovery from  
153 metagenomic samples manifold. *Nat. Methods*, **16**, 603–606.
- 154 Wood,D.E. *et al.* (2019) Improved metagenomic analysis with Kraken 2. *Genome Biol.*, **20**, 257.
